# Supplementary material
Source: PubMed Central journal article supplement (PMC3157250)
Supplement: NIHMS314391-supplement-02.pdf [file NIHMS314391-supplement-02.pdf]

Supplemental Data for:

## **Enzyme Inhibition by Allosteric Capture of an Inactive Conformation**

Gregory M. Lee<sup>1</sup>, Tina Shahian<sup>2</sup>, Aida Baharuddin<sup>1</sup>,  
Jonathan E. Gable<sup>3</sup>, and Charles S. Craik<sup>1\*</sup>

<sup>1</sup> Department of Pharmaceutical Chemistry  
University of California  
San Francisco, CA 94158-2280  
USA

<sup>2</sup> Graduate Group in Biochemistry and Molecular Biology  
University of California  
San Francisco, CA, 94158-2280  
USA

<sup>3</sup> Graduate Group in Biophysics  
University of California  
San Francisco, CA, 94158-2280  
USA

\* Correspondence should be addressed to C.S.C. ([craik@cgl.ucsf.edu](mailto:craik@cgl.ucsf.edu))

## SUPPLEMENTAL DATA TABLE OF CONTENTS

|                                                                                              |    |
|----------------------------------------------------------------------------------------------|----|
| <b>Movie S1-S3 Captions:</b> Morph animations .....                                          | 3  |
| <b>Fig. S1:</b> <sup>15</sup> N- <sup>1</sup> H HSQC spectra of KSHV Pr truncations .....    | 4  |
| <b>Fig. S2:</b> <sup>13</sup> C- <sup>1</sup> H HSQC spectra of KSHV Pr truncations .....    | 5  |
| <b>Fig. S3:</b> <sup>13</sup> C- <sup>1</sup> H HSQC spectra of the Ile-to-Val mutants ..... | 6  |
| <b>Fig. S4:</b> DD2 titration of KSHV Pr M197D-I201V .....                                   | 8  |
| <b>Fig. S5:</b> The alternative conformation of the KSHV Pr Δ196-DD2 complex .....           | 9  |
| <b>Fig. S6:</b> <i>In situ</i> DD2 F <sub>o</sub> -F <sub>c</sub> omit maps .....            | 11 |
| <b>Fig. S7:</b> The conformations of KSHV Pr-bound DD2 .....                                 | 12 |
| <b>Table S1:</b> Overall average B-values: KSHV Pr Δ196-DD2 .....                            | 13 |
| <b>Table S2:</b> Structural comparison of KSHV Pr constructs .....                           | 13 |
| <b>Table S3:</b> Average sidechain B-values of residues ≤ 5 Å to DD2 .....                   | 14 |
| <b>Table S4:</b> Structural comparison of KSHV Pr-bound DD2 conformations .....              | 15 |
| <b>Table S5:</b> Selected KSHV Pr Δ196 residue-DD2 sidechain interatomic distances.....      | 16 |
| <b>Table S6:</b> Average sidechain B-values of the active-site residues .....                | 17 |
| <b>Table S7:</b> DD2 solubility and cell permeability .....                                  | 18 |
| <b>Table S8:</b> Structural comparison of HHV Pr monomers vs. KSHV Pr.....                   | 18 |
| <b>References</b> .....                                                                      | 19 |

**Movie S1. KSHV Pr dimer with the dimer interface and C-terminal truncations.** A rotation of the KSHV Pr dimer (2PBK) focusing on the dimer interface, including the C-terminal  $\alpha$ -helices 5 and 6. The animation also displays the positions of the C-terminal truncations.

**Movie S2. DD2 pocket morph of the KSHV Pr monomeric units from apo to DD2-bound states.** A morph modeling the structural transition of a monomeric unit of the KSHV Pr dimer (2PBK) to the KSHV Pr  $\Delta$ 196-DD2 complex (3NJQ), focusing on the allosteric DD2 binding pocket. Residues 197-230 of 2PBK are omitted for clarity.

**Movie S3. Active site morph of the KSHV Pr monomeric units from apo to DD2-bound states.** A morph modeling the structural transition of a monomeric unit of the KSHV Pr dimer (2PBK) to the KSHV Pr  $\Delta$ 196-DD2 complex (3NJQ), focusing on the active site. Residues 197-230 of 2PBK are omitted for clarity.

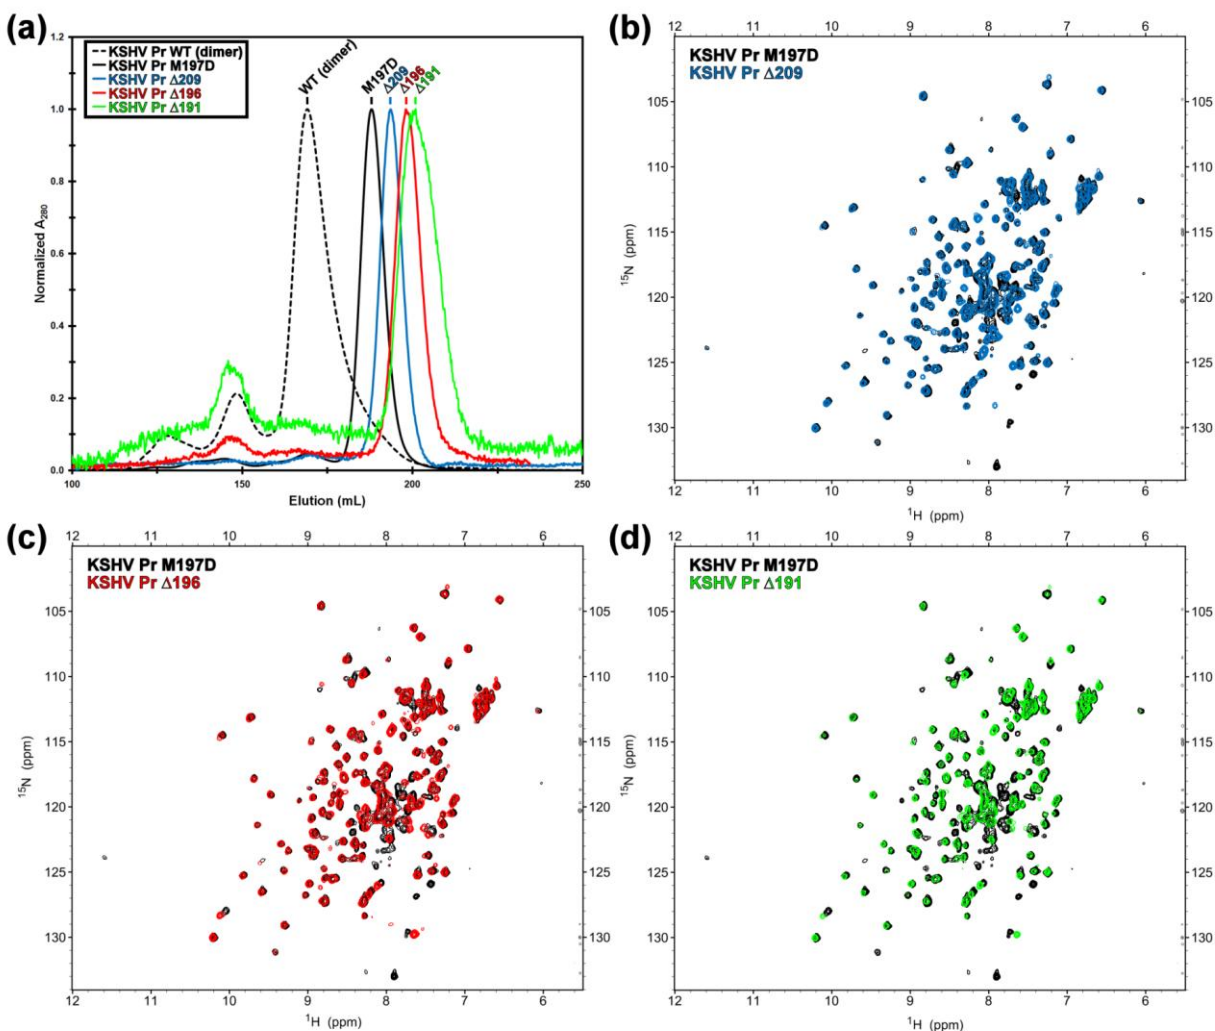

**Figure S1. The  $^{15}\text{N}$ - $^1\text{H}$  HSQC spectra of KSHV Pr truncations.** (a) Size exclusion chromatograms of the KSHV Pr truncations ( $\Delta 209$ , blue;  $\Delta 196$ , red;  $\Delta 191$  green) indicate that each elute as monomers. Wild-type KSHV Pr dimer (dashed black) and the obligate M197D monomer (solid black) are presented as references. The peaks eluting less than 150 mL indicate unidentified oligomeric species. Overlays of the  $^{15}\text{N}$ - $^1\text{H}$  HSQC spectra of uniformly  $^{15}\text{N}$ -labeled KSHV Pr M197D and  $\Delta 209$  (b),  $\Delta 196$  (c), and  $\Delta 191$  (d) indicate no significant structural perturbations of the core protein backbone upon truncation of the conformationally dynamic C-terminal residues.

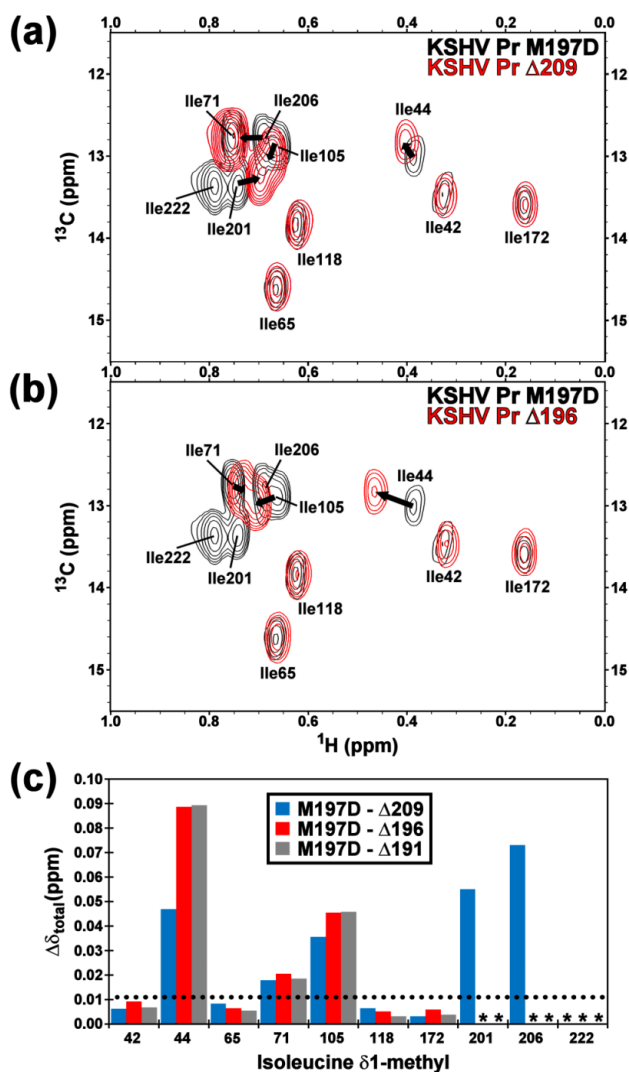

**Figure S2.  $^{13}\text{C}$ - $^1\text{H}$  HSQC spectra of KSHV Pr truncations.** The  $^{13}\text{C}$ - $^1\text{H}$  HSQC spectra focusing on the isoleucine  $\delta 1$ -methyl resonances of selective [ $^{13}\text{C}$ - $^1\text{H}$  methyl] ILV labeled KSHV Pr M197D (black) superimposed with those of  $\Delta 209$  (a, red) and  $\Delta 196$  (b, red). No significant spectral differences are observed between the  $\Delta 196$  and  $\Delta 191$  constructs (not shown). (c) Combined chemical shift perturbations between the full-length monomer and truncated KSHV Pr constructs  $> 0.01$  ppm (dotted line) clearly identify the interfacial (Ile44 and Ile105) and C-terminal (Ile201, Ile206, and Ile222) residues. Asterisks indicate no isoleucine residue present in the selected truncation.

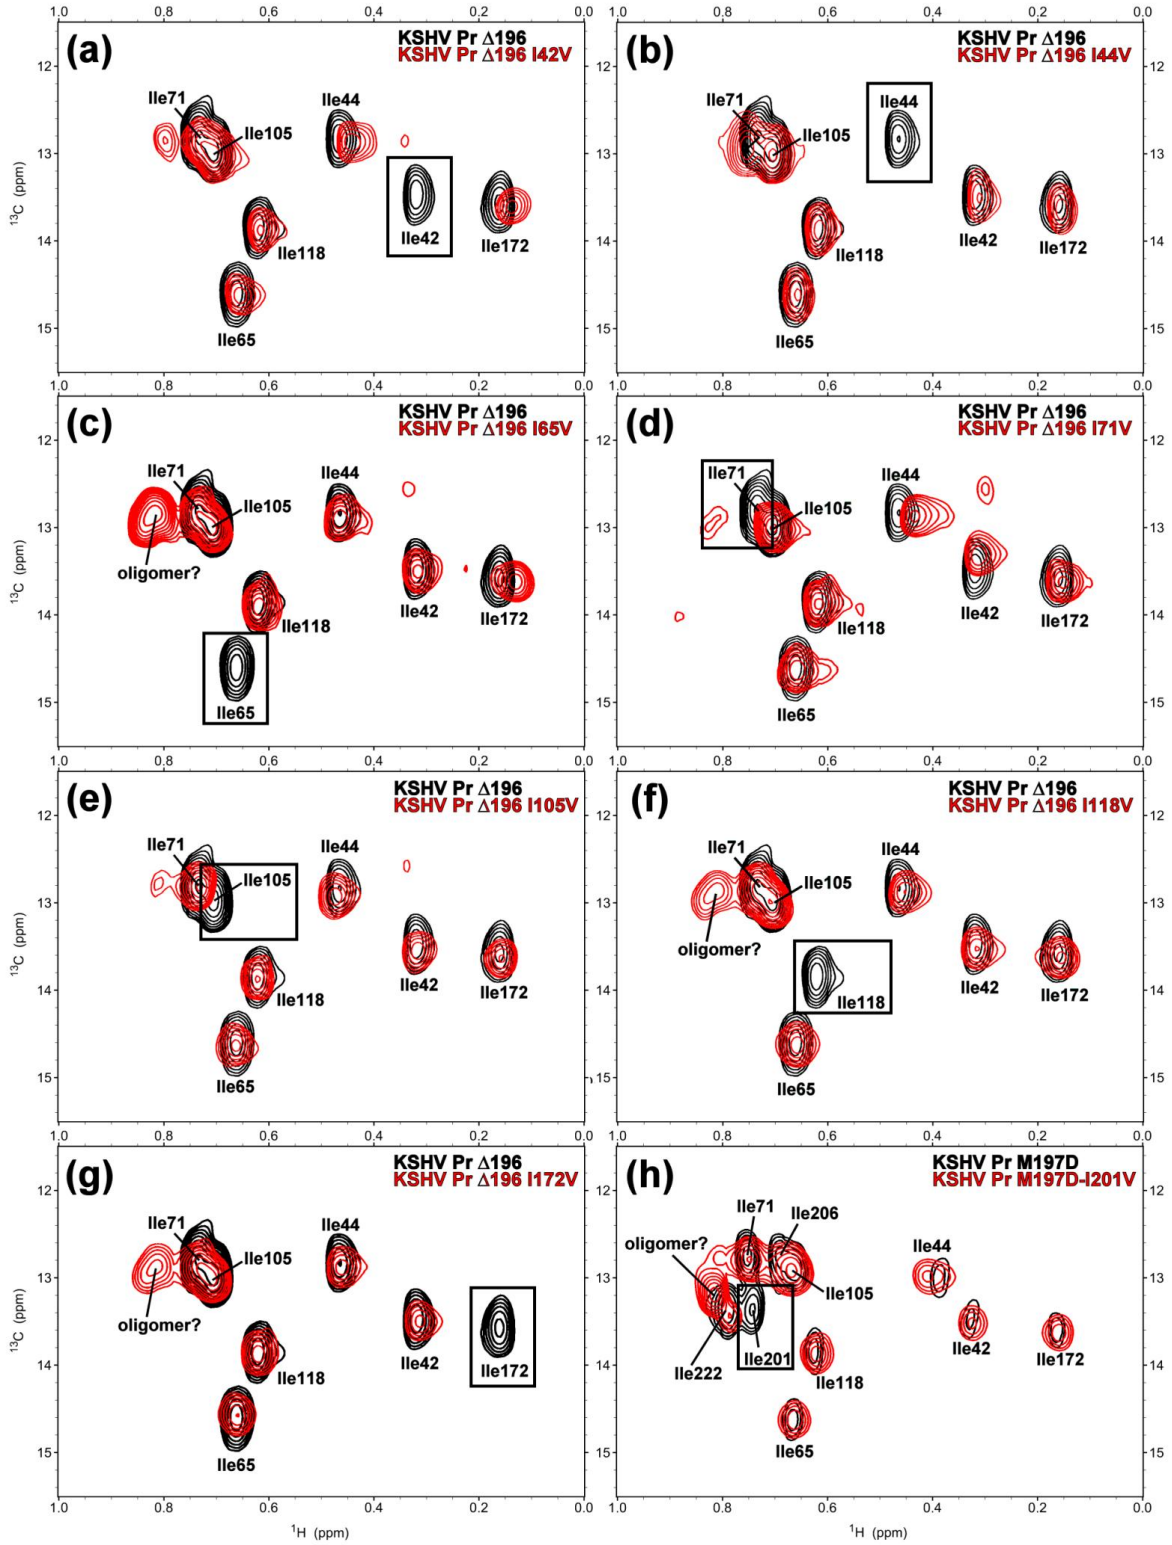

**Figure S3. The  $^{13}\text{C}$ - $^1\text{H}$  HSQC spectra of the Ile-to-Val mutants.** Significant aggregation of the KSHV Pr obligate monomer at high protein concentrations precluded the acquisition of triple-resonance experiments typically used to assign resonances. Therefore, Ile-to-Val mutations were performed to assign the Ile  $\delta$ 1-methyl groups. Overlays of the  $^{13}\text{C}$ - $^1\text{H}$  HSQC spectra of these mutants (**a-h**, as indicated) suggest no significant structural perturbations relative to the “wild-type” constructs. Missing resonances (boxed) indicate the identity of the Ile-to-Val mutation. The Ile222 peak was identified by comparing the spectra of full-length KSHV Pr M197D and the  $\Delta$ 209 construct (**Fig. S2**). The Ile206 peak was identified through a process of elimination. The respective  $^{15}\text{N}$ - $^1\text{H}$  HSQC spectra (not shown) display no significant resonance perturbations relative to the full-length KSHV Pr M197D construct.

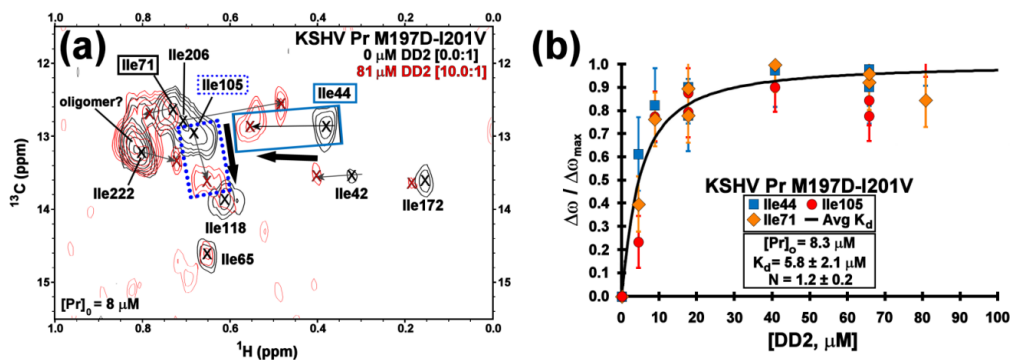

**Figure S4. DD2 titration of KSHV Pr M197D-I201V.** (a) The  $^{13}\text{C}$ - $^1\text{H}$  HSQC titration spectra of the KSHV Pr M197D-I201V construct with DD2. The spectral overlays display apo (black) and  $> 5$  molar equivalents DD2 (red), and are focused on the isoleucine  $\delta$ 1-methyl region. Ile44 (solid blue box), Ile105 (dotted blue box), and Ile71 (solid black box) are used as the binding probes. (b) The binding curve represents the average of the Hill equation-derived apparent  $K_d$  values calculated for the three probes (symbols as indicated). Comparisons with the M197D and  $\Delta$ 196 constructs are illustrated in **Figure 2**.



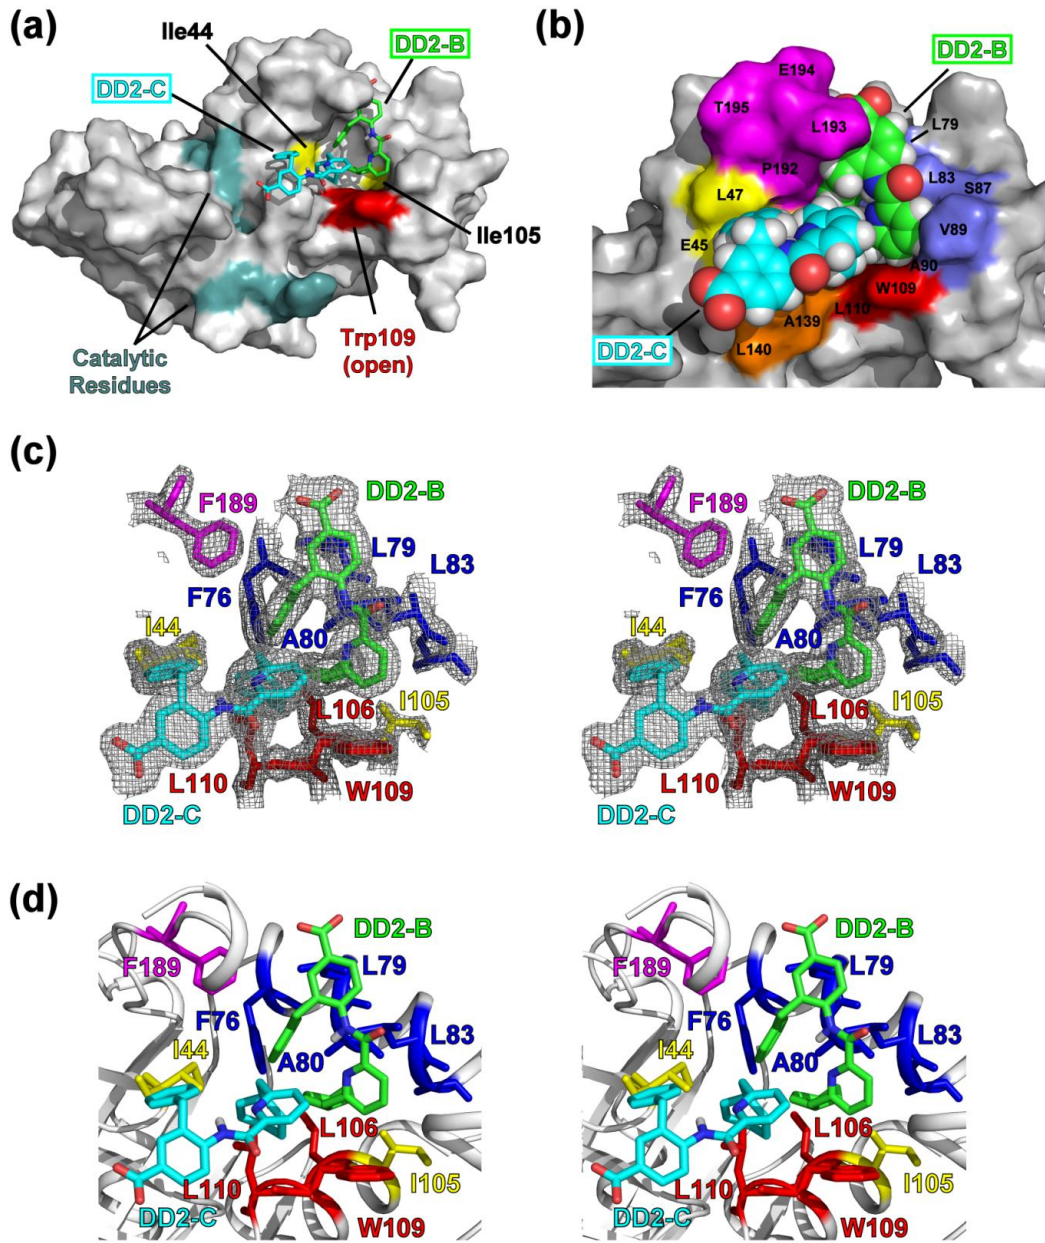

**Figure S5. The alternate conformation of the KSHV Pr  $\Delta$ 196-DD2 complex.** (a) Monomer B of the KSHV Pr  $\Delta$ 196-DD2 complex contains two DD2 molecules (DD2-B, green carbons; DD2-C, cyan carbons). DD2-C is located outside the binding pocket and may act as a “bridging” molecule between crystallographic unit cells. (b) The hydrophobic DD2 binding pocket is composed of aliphatic residues from the  $\beta$ 2- $\beta$ 3 loop (yellow), helix 1 and the  $\alpha$ 1- $\alpha$ 2 loop (blue), helix 2 (red), the  $\beta$ 6- $\beta$ 7 loop (orange), and the C-terminus (magenta). DD2-B (green carbons) and DD2-C (cyan carbons) of DD2 are shown as space filling models. (c) Stereoview of DD2-B (green) and DD2-C (cyan) within the  $\Delta$ 196 binding pocket of monomer B, in relation to the “hot spot” Trp109 (red) and the Ile44 and Ile105 reporter groups (yellow). Also displayed are the buried aliphatic residues of helix 1 (blue), helix 2 (red), and the C-terminus (magenta) that compose the binding pocket. The mesh represents the  $2F_o - F_c$   $1\sigma$  electron density map. (d) **Figure S5c** with the protein backbone ribbons displayed. These figures are comparable to **Figures 4 and 5**.

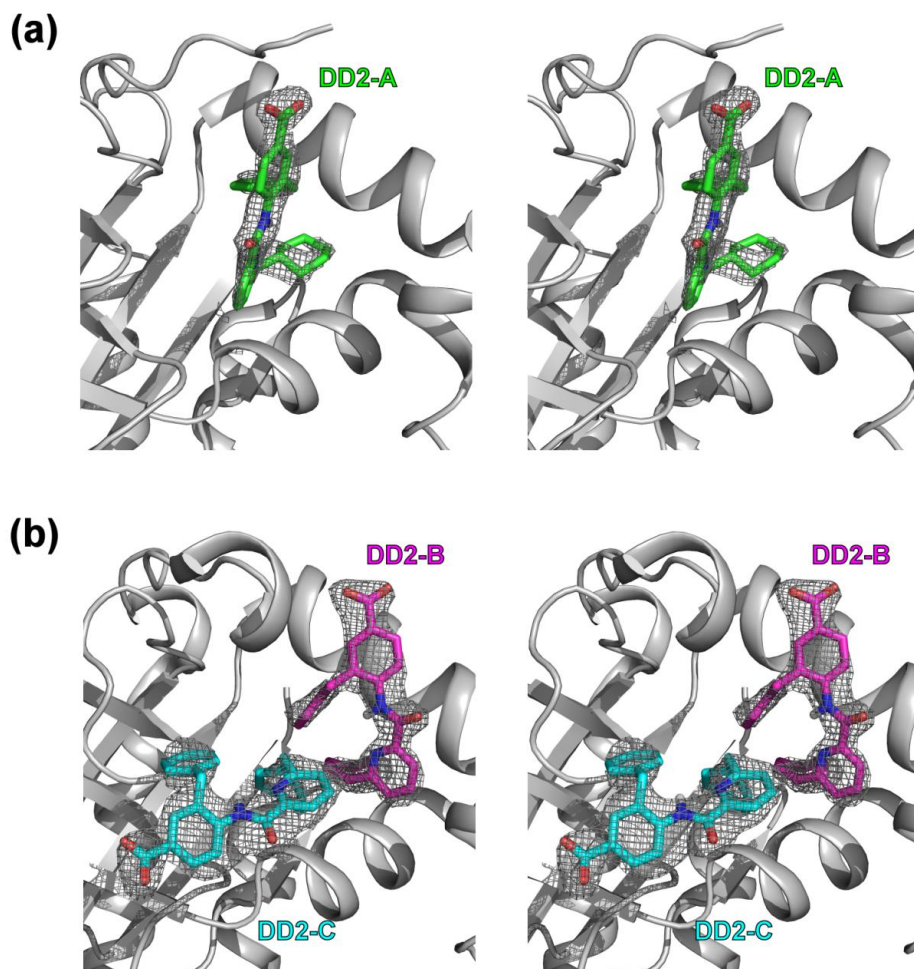

**Figure S6.** *In situ* DD2  $F_o-F_c$  omit maps. (a) A stereoview of the KSHV Pr  $\Delta$ 196-DD2 monomer A. The mesh surrounding DD2-A (green carbons) represents the  $F_o-F_c$  omit map contoured at  $3.0\sigma$ . (b) A stereoview of the KSHV Pr  $\Delta$ 196-DD2 monomer B. The mesh surrounding DD2-B (magenta carbons) and DD2-C (cyan carbons) represents the  $F_o-F_c$  omit map contoured at  $3.0\sigma$ .

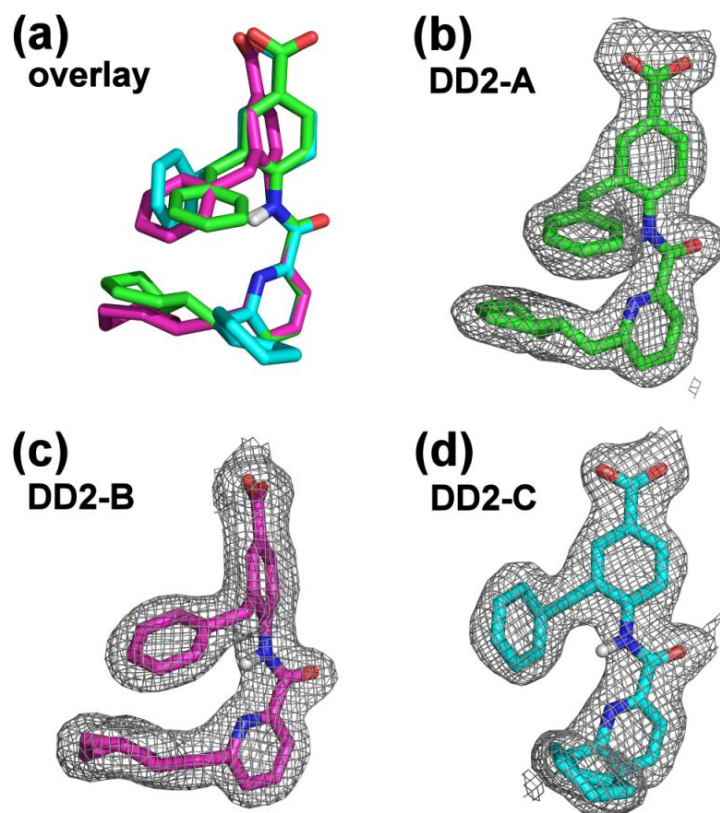

**Figure S7. The poses of KSHV Pr-bound DD2.** (a) The superimposed DD2 crystal structures (DD2-A, green carbons; DD2-B, magenta carbons; DD2-C, cyan carbons) exhibit distinct conformers. Shown are the  $2F_o - F_c$   $1\sigma$  electron density images of the three poses of the DD2 bound to the KSHV Pr  $\Delta 196$  construct: DD2-A (**b**, green) in monomer A; DD2-B (**c**, magenta) and DD2-C (**d**, cyan) in monomer B. The structures of the KSHV Pr  $\Delta 196$  construct are omitted for clarity.

**TABLE S1.**  
**AVERAGE B-VALUES: KSHV PR Δ196-DD2**

| KSHV Pr Δ196-DD2 complex | Monomer A (Å <sup>2</sup> ) | Monomer B (Å <sup>2</sup> ) |
|--------------------------|-----------------------------|-----------------------------|
| Backbone heavy atoms     | 49.1                        | 40.2                        |
| Sidechain heavy atoms    | 52.8                        | 43.7                        |
| All heavy atoms          | 50.9                        | 41.9                        |

**TABLE S2.**  
**STRUCTURAL COMPARISON OF KSHV PR CONSTRUCTS**

| Overlay (residues 1-196)  | <sup>a</sup> RMSD<br>Backbone Atoms (Å) | <sup>a</sup> RMSD<br>Heavy Atoms(Å) |
|---------------------------|-----------------------------------------|-------------------------------------|
| 2PBK (A) vs. Δ196-DD2 (A) | 0.77                                    | 0.89                                |
| 2PBK (A) vs. Δ196-DD2 (B) | 0.77                                    | 0.95                                |
| 1FL1 (B) vs. Δ196-DD2 (A) | 0.60                                    | 0.74                                |
| 1FL1 (B) vs. Δ196-DD2 (B) | 0.60                                    | 0.77                                |
| Δ196-DD2 monomer A vs B   | 0.52                                    | 0.61                                |

<sup>a</sup>RMSD calculations performed using Pymol 1.2 (Schrödinger, LLC).

**2PBK** = peptide-phosphonate inhibited KSHV Pr dimer<sup>1</sup>

**1FL1** = apo KSHV Pr dimer<sup>2</sup>

**3NJQ** = KSHV Pr Δ196-DD2 complex, **this study**.

**TABLE S3.**  
**AVERAGE <sup>a</sup>SIDECHAIN B-VALUES OF RESIDUES  $\leq 5 \text{ \AA}$  TO DD2**

| <sup>b</sup> DD2-A & DD2-B (inhibitors) |                                 |                                 | <sup>b</sup> DD2-C (bridging molecule) |                                 |                                 |
|-----------------------------------------|---------------------------------|---------------------------------|----------------------------------------|---------------------------------|---------------------------------|
| Residue                                 | Monomer A<br>( $\text{\AA}^2$ ) | Monomer B<br>( $\text{\AA}^2$ ) | Residue                                | Monomer A<br>( $\text{\AA}^2$ ) | Monomer B<br>( $\text{\AA}^2$ ) |
| Phe 76                                  | 26.3                            | 28.4                            | Glu 45                                 | n/a                             | 31.4                            |
| Leu 79                                  | 30.0                            | 36.2                            | Leu 47                                 | n/a                             | 34.4                            |
| Ala 80                                  | 26.7                            | 28.8                            | Trp 109                                | n/a                             | 24.7                            |
| Leu 83                                  | 29.2                            | 29.8                            | Leu 110                                | n/a                             | 23.4                            |
| Val 89                                  | 28.5                            | 34.4                            | Ala 139                                | n/a                             | 30.4                            |
| Ala 90                                  | 26.3                            | 27.3                            | Leu 140                                | n/a                             | 30.9                            |
| <b>Trp 109</b>                          | <b>28.6</b>                     | <b>24.7</b>                     | Arg 144                                | n/a                             | 47.3                            |
| Leu 110                                 | 25.0                            | 23.4                            |                                        |                                 |                                 |
| Ala 139                                 | 36.5                            | 30.4                            |                                        |                                 |                                 |
| Leu140                                  | 48.7                            | 30.9                            |                                        |                                 |                                 |
| Phe 189                                 | 32.6                            | 33.7                            |                                        |                                 |                                 |
| Pro 192                                 | 44.9                            | 37.2                            |                                        |                                 |                                 |
| Leu 193                                 | 50.7                            | 39.3                            |                                        |                                 |                                 |
| Glu 194                                 | <sup>c</sup>                    | 53.1                            |                                        |                                 |                                 |
| <sup>d</sup> Average                    | 34.2                            | 32.6                            | <sup>d</sup> Average                   | n/a                             | 32.0                            |
| Stdev.                                  | 9.5                             | 8.1                             | Stdev.                                 | n/a                             | 9.5                             |
| <sup>e</sup> Overall<br>Average         | 33.4                            |                                 | Overall<br>Average <sup>d</sup>        | 47.3                            |                                 |
| Stdev.                                  | 8.8                             |                                 | Stdev.                                 | 18.0                            |                                 |

<sup>a</sup> Includes  $C\alpha$  atom.

<sup>b</sup> DD2-A = 3NJQ A 197; DD2-B = 3NJQ B 198; DD2-C = 3NJQ B 199

<sup>c</sup> Electron density maps of Glu194 – Leu 196 not observed for 3NJQ monomer A.

<sup>d</sup> Average and standard deviation of the individual monomers.

<sup>e</sup> Overall average and standard deviation of the dimer.

**TABLE S4.**  
**STRUCTURAL COMPARISON OF KSHV PR-BOUND DD2 CONFORMATIONS**

| DD2 Overlay          | <sup>a</sup> RMSD (Å)<br>all atoms | <sup>a</sup> RMSD (Å)<br>all hv atoms | <sup>a</sup> RMSD (Å)<br><sup>b</sup> backbone | <sup>a</sup> RMSD (Å)<br><sup>b</sup> backbone+<br><sup>c</sup> sidechain 1 | <sup>a</sup> RMSD (Å)<br><sup>b</sup> backbone+<br><sup>d</sup> sidechain 2 |
|----------------------|------------------------------------|---------------------------------------|------------------------------------------------|-----------------------------------------------------------------------------|-----------------------------------------------------------------------------|
| <sup>e</sup> A vs. B | 1.91                               | 1.12                                  | 0.51                                           | 0.86                                                                        | 1.03                                                                        |
| <sup>e</sup> A vs. C | 1.99                               | 0.53                                  | 0.34                                           | 0.85                                                                        | 0.36                                                                        |
| <sup>e</sup> B vs. C | 3.12                               | 2.43                                  | 0.67                                           | 1.74                                                                        | 0.98                                                                        |

<sup>a</sup> RMSD calculations performed using Pymol 1.2 (Schrödinger, LLC).

<sup>b</sup> DD2 backbone = 4-(pyridine-2-amido) benzoic acid.

<sup>c</sup> Sidechain 1 = cyclohexyl methylenyl group

<sup>d</sup> Sidechain 2 = benzyl group

<sup>e</sup> DD2-A = 3NJQ A 197; DD2-B = 3NJQ B 198; DD2-C = 3NJQ B 199

| DD2 pose #<br>(Monomer ID) | <sup>f</sup> Amide H-pyridine N<br>distance (Å) | <sup>f</sup> Amide N-pyridine N<br>dihedral angle (°) |
|----------------------------|-------------------------------------------------|-------------------------------------------------------|
| DD2-A (A 197)              | 2.1 Å                                           | -7.0°                                                 |
| DD2-B (B 198)              | 2.2 Å                                           | -4.9°                                                 |
| DD2-C (B 199)              | 2.2 Å                                           | -9.7°                                                 |

<sup>f</sup> Measurements performed using Pymol 1.2 (Schrödinger, LLC).

**TABLE S5.**  
**SELECTED KSHV PR Δ196- DD2 SIDECHAIN INTERATOMIC DISTANCES (Å)**

| <sup>a</sup> DD2 atom # | Δ196 residue | Atom         | <sup>b</sup> Monomer A (Å) | <sup>c</sup> Monomer B (Å) |
|-------------------------|--------------|--------------|----------------------------|----------------------------|
| #27<br>(benzyl ring)    | Ile 44       | Cδ1          | 3.8                        | 5.8                        |
|                         | Phe 76       | Cδ / Cε / Cζ | 3.7 / 3.6 / 4.9            | 4.7 / 4.1 / 5.1            |
|                         | Leu 79       | Cδ1 / Cδ2    | 4.4 / 5.1                  | 5.0 / 6.1                  |
|                         | Leu 83       | Cδ1 / Cδ2    | 6.3 / 8.5                  | 4.9 / 7.2                  |
|                         | Phe 189      | Cδ / Cε / Cζ | 4.9 / 3.8 / 3.7            | 7.3 / 6.0 / 5.5            |
|                         | Pro 192      | Cβ / Cγ / Cδ | 7.4 / 6.0 / 5.9            | 5.6 / 4.4 / 4.5            |

| <sup>a</sup> DD2 atom # | Δ196 residue | Atom         | <sup>b</sup> Monomer A (Å) | <sup>c</sup> Monomer B (Å) |
|-------------------------|--------------|--------------|----------------------------|----------------------------|
| #11<br>(cyclohexyl)     | Ile 44       | Cδ1          | 8.5                        | 7.8                        |
|                         | Phe 76       | Cδ / Cε / Cζ | 7.1 / 6.1 / 6.1            | 6.3 / 5.2 / 5.0            |
|                         | Ala 80       | Cβ           | 4.5                        | 4.0                        |
|                         | Leu 83       | Cδ1 / Cδ2    | 4.3 / 6.4                  | 5.2 / 7.0                  |
|                         | Ala 90       | Cβ           | 4.9                        | 6.3                        |
|                         | Ile 105      | Cγ2 / Cδ1    | 3.7 / 7.0                  | 3.8 / 6.9                  |
|                         | Leu 106      | Cδ1 / Cδ2    | 5.0 / 7.2                  | 3.7 / 5.9                  |
|                         | Trp 109      | Cβ           | 5.4                        | 5.1                        |
|                         | Leu 110      | Cδ1 / Cδ2    | 6.5 / 7.6                  | 5.0 / 6.5                  |

<sup>a</sup> DD2 numbering performed using ACD ChemSketch 12.0.

<sup>b</sup> DD2-A to monomer A residues;

<sup>c</sup> DD2-B to monomer B residues.

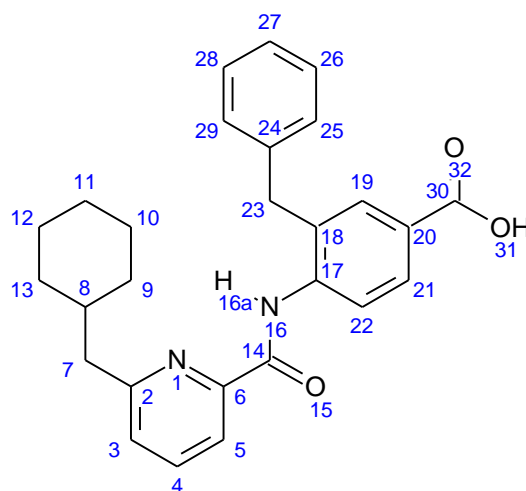



**TABLE S6.**  
**AVERAGE <sup>a</sup>SIDECHAIN B-VALUES OF THE ACTIVE-SITE RESIDUES**

| Residue | Catalytic Triad             |                             |
|---------|-----------------------------|-----------------------------|
|         | Monomer A (Å <sup>2</sup> ) | Monomer B (Å <sup>2</sup> ) |
| His 46  | 32.3                        | 36.1                        |
| Ser 114 | 35.8                        | 31.8                        |
| His 134 | 32.8                        | 32.9                        |
| Average | 33.3                        | 34.0                        |
| Stdev.  | 2.1                         | 2.8                         |

| <b>β1-α0 loop<br/>(residues 14-27)</b> |                                |                                | <b>β6-β7 loop<br/>(residues 139-149)</b> |                                |                                |
|----------------------------------------|--------------------------------|--------------------------------|------------------------------------------|--------------------------------|--------------------------------|
| Residue                                | Monomer A<br>(Å <sup>2</sup> ) | Monomer B<br>(Å <sup>2</sup> ) | Residue                                  | Monomer A<br>(Å <sup>2</sup> ) | Monomer B<br>(Å <sup>2</sup> ) |
| Val 14                                 | 43.8                           | 35.7                           | Cys 138                                  | 34.1                           | 31.6                           |
| Ser 15                                 | 52.9                           | 48.4                           | Ala 139                                  | 36.5                           | 30.4                           |
| Cys 16                                 | 52.9                           | 53.2                           | Leu 140                                  | 48.7                           | 30.9                           |
| Pro 17                                 | 45.9                           | 61.2                           | Gly 141                                  | 54.9                           | 34.6                           |
| Lys 18                                 | 52.3                           | 77.7                           | <sup>b</sup> Arg 142                     | <b>59.4</b>                    | <b>36.0</b>                    |
| Leu 19                                 | 61.7                           | 81.0                           | <sup>b</sup> Arg 143                     | <b>75.6</b>                    | <b>41.0</b>                    |
| Glu 20                                 | 86.6                           | 66.8                           | Arg 144                                  | 84.4                           | 47.3                           |
| Gln 21                                 | 73.8                           | 54.1                           | Gly 145                                  | 63.3                           | 32.4                           |
| Glu 22                                 | 58.3                           | 41.9                           | Thr 146                                  | 60.4                           | 26.6                           |
| Leu 23                                 | 64.4                           | 47.0                           | Val 147                                  | 45.9                           | 27.1                           |
| Tyr 24                                 | 55.7                           | 33.8                           | Ala 148                                  | 38.0                           | 26.0                           |
| Leu 25                                 | 54.9                           | 41.7                           | Val 149                                  | 40.5                           | 30.2                           |
| Asp 26                                 | 75.5                           | 50.2                           |                                          |                                |                                |
| Pro 27                                 | 64.0                           | 42.7                           |                                          |                                |                                |
| <sup>c</sup> Average                   | 61.0                           | 52.3                           | <sup>c</sup> Average                     | 59.1                           | 35.2                           |
| Stdev.                                 | 12.1                           | 15.1                           | Stdev.                                   | 17.1                           | 8.3                            |
| <sup>d</sup> Overall<br>Average        | 56.6                           |                                | <sup>d</sup> Overall<br>Average          | 47.3                           |                                |
| Stdev.                                 | 14.3                           |                                | Stdev.                                   | 18.0                           |                                |

<sup>a</sup> Includes C<sub>α</sub> atom.

<sup>b</sup> Oxyanion hole-stabilizing residues.

<sup>c</sup> Average and standard deviation of the individual monomers.

<sup>d</sup> Overall average and standard deviation of the dimer.

**TABLE S7.**  
**DD2 SOLUBILITY AND CELL PERMEABILITY**

|     | <sup>a</sup> Solubility ( $\mu\text{M}$ ) | <sup>b</sup> Permeability ( $10^{-6} \text{ cm s}^{-1}$ ) | <sup>c</sup> Retention (%) |
|-----|-------------------------------------------|-----------------------------------------------------------|----------------------------|
| DD2 | 0.49                                      | 296                                                       | 91                         |

<sup>a</sup> Solubility in PBS buffer (pH 7.4) containing 1% DMSO

<sup>b,c</sup> Permeability/retention across an artificial membrane (PAMPA), pH 7.4

**TABLE S8.**  
**STRUCTURAL COMPARISON OF <sup>a</sup>HHV Pr MONOMERS VS KSHV Pr**

| <sup>b</sup> Overlay,<br>all residues | HHV Pr<br>subfamily | PDB<br>accession<br>code | <sup>b,c</sup> RMSD<br>Backbone Atoms<br>( $\text{\AA}$ ) | <sup>b,c</sup> RMSD<br>Heavy Atoms<br>( $\text{\AA}$ ) |
|---------------------------------------|---------------------|--------------------------|-----------------------------------------------------------|--------------------------------------------------------|
| HSV-2 Pr                              | Alpha               | 1AT3                     | 1.11                                                      | 1.38                                                   |
| VZV Pr                                | Alpha               | 1VZV                     | 1.09                                                      | 1.34                                                   |
| HCMV Pr                               | Beta                | 1CMV                     | 0.75                                                      | 0.82                                                   |
| EBV Pr                                | Gamma               | 1O6E                     | 0.95                                                      | 1.17                                                   |

<sup>a</sup> No PDB files are currently available for HSV-1 Pr, HHV-6 Pr and HHV-7 Pr.

<sup>b</sup> Overlay of monomer A from each PDB file onto KSHV Pr monomer A (2PBK)

<sup>c</sup> RMSD calculations performed using Pymol 1.2 (Schrödinger, LLC).

## REFERENCES

1. Lazic, A., Goetz, D. H., Nomura, A. M., Marnett, A. B. & Craik, C. S. (2007). Substrate Modulation of Enzyme Activity in the Herpesvirus Protease Family. *J Mol Biol* **373**, 913-923.
2. Reiling, K. K., Pray, T. R., Craik, C. S. & Stroud, R. M. (2000). Functional consequences of the Kaposi's sarcoma-associated herpesvirus protease structure: regulation of activity and dimerization by conserved structural elements. *Biochemistry* **39**, 12796-803.
